# Supplementary material for: Italian Tsunami Effects Database (ITED): the first database of tsunami effects observed alongthe Italian coasts
Source: Copernicus journal article supplement (doi:10.5194/nhess-2019-241), 2019-08-07
Supplement: Supplementary file [file nhess-2019-241-RC4-supplement.pdf]

## Review of the paper by A.Maramai et al " Italian Tsunami Effect Database"

The paper describes structure and the data content of the ITED (Italian Tsunami Effect Database) that was created as a supporting part of the EMTC (Euro Mediterranean Tsunami Catalogue) database. The data on coastal tsunami manifestation, compiled within the ITED, have been collected from a variety of published and archival sources and were carefully revised. They are extremely important for assessment of tsunami hazard along the Italian coast. The paper is written in a compact and informative manner and can be published as it is, after several minor corrections listed below.

Page 4 line 4

Reference for (Guidibini et al., 2018) is absent in the Reference list.

Page 4 line 33

"... where inundation values are specified,..." . " values" is a very general term, it should be replaced with more specific term like "extent" or "distance"

Page 5 line 35

Reference for (Guidibini et al., 2018) is absent in the Reference list

Page 6 line 13

The indicated web-reference does not work

Page 6 line 14

"the OP" should be types as "OPs"

Page 8 line 35 (References)

Is the paper (Platania, 1909) written in Italian? In this case "(in Italian)" should be added to its reference

Page 9 line 1 (References)

The reference

Rovida A., Locati M., Antonucci A., Camassi R. (eds.): Italian Archive of Historical Earthquake Data (ASMI). Istituto Nazionale di Geofisica e Vulcanologia (INGV). <https://emidius.mi.ingv.it/ASMI/>

in the text is cited in two different ways

Rovida et al., 2016 (page 3 line 32)

Rovida et al., Eds (page 3 line 35)

Rovida et al., 2016 (page 5 line 35)

Page 9 line 12-13 (References)

The reference

TSUMAPS-NEAM Interactive Tool: <http://ai2lab.org/tsumapsneam/interactive-hazard-curve-tool/> last access July 2019.

is not mentioned in the text

Page 12 line 3 (in caption to Figure 3)

webApp should be typed as WebApp (as in the text)

In some places, the English should be polished **up** (several examples are below):

"being affected during times" (page 5 line 4)

"accordingly to the new achieved info" (page 5 line 27)

"About the 1690 event, ..." (page 5 line 35)

"provoking victims" (page 5 line 36)

"respect to EMTC" (page 6 line 4)

"struck localities" (page 6 line 15)

"The events... are divided into 4 main causes" (page 6 line 35)

"filtering expressions" (page 7 line 8)

"also distant sources, including in ITED also the effects produced on the Italian coasts" (page 7 line 29)
